# Supplementary material for: Comparative Dynamics of Delta and Omicron SARS-CoV-2 Variants across and between California and Mexico
Source: MDPI journal article supplement (doi:10.3390/v14071494), 2022-07-08

# Supplementary Tables and Figures

**Supplementary Table 1. Distribution of full-length SARS-CoV2 genomes by county sampled in California and by state sampled in Mexico in 2021-2022.** Panel A. Delta variant, Panel B: Omicron variant.

**Supplementary Table S2.** Sampling overview of each replicate for Delta and Omicron.

**Supplementary Table S3.** Skewness and kurtosis of the distribution of the external introduction events and viral migrations for Omicron and Delta variants.

**Supplementary Figure S1.** Map of publicly available SARS-CoV-2 sequences that have been deposited in the GISAID database [12] as of January 31<sup>st</sup>, 2022, for the Delta variant (panel A) and the Omicron variant (panel B).

**Supplementary Figure S2. Number of COVID-19 confirmed cases and full-length genome sequences by location.** Scatter plot showing the number of confirmed cases per state per 100,000 individuals (X-axis) in California (left panel) and Mexico (right panel) vs. the number of cases sequenced (Y-axis) as of January 31<sup>st</sup>, 2022 (publicly available on GISAID). Locations with >10,000 sequences are labeled.

**Supplementary Figure S3. Map of COVID-19 cases per 100,000 individuals up to January 31<sup>st</sup> 2022.** Total number of confirmed COVID-19 cases per 100,000 individuals in Californian counties [16] and in Mexican states [17,56].

**Supplementary Figure S4. Visualization of Delta (A) and Omicron (B) genomes using MicroReact.** MicroReact [15] display of the geolocation of all genomes with associated lineage inferred by the Pangolin assignment tool [186]. See also **Figure 1** and MicroReact projects

<https://microreact.org/project/rqnwd9nymcvdkvq1dktbfj> and

<https://microreact.org/project/d5mbblhkwgxtcfu6wdtxt> for Delta and Omicron respectively.

**Supplementary Figure S5. Density plots of external introduction of the identified clades for delta (Panel A) and Omicron (Panel B) variants for the 10 replicates.** A normal distribution was specified for the evolutionary rate with a mean  $9.41 \times 10^{-4}$  nucleotide substitutions per site per year and a standard deviation of  $4.99 \times 10^{-5}$  [7]. See also **Figure 2**.

**Supplementary Figure S6. Map of migration events between location for Delta (Panel A) and Omicron (Panel B) variants.** The thickness of the arrows reflects the average number of inferred transmission events between locations and the colors of the arrows indicate the timing of the transmission event. Locations are colored according to the number of sequences. See also **Figure 3**.

**Supplementary Figure S7. Proportion of viral migration events from each source location ('from') toward the recipient location ('to') for Delta (Panel A) and Omicron (Panel B) variants.** The Sankey plot shows the proportion of viral migration events from each source location (California county or Mexico state) toward the recipient location. Left side of the plot shows the source location ('from') and right side of the plot shows the destination location ('to'). We only report migration events associated with an adjusted Bayes factor ( $BF_{adj} \geq 3$ ).

**Supplementary Figure S8. Probability Density of variant migration events between locations for Delta (Panel A) and Omicron (Panel B) variants.** Only migration events supported with an adjusted Bayes Factor  $\geq 3$  are considered. See also **Figure 5**.

**Supplementary Figure S9. Relative contribution of national vs. international transmission events to the Delta (Panel A) and Omicron (Panel B) epidemics overtime.** See also **Figure 6** for the overall proportion of cross-border migration events.

**Supplementary Figure S10. Distribution of the geographic distances of phylogenetic lineage movement events for Delta (Panel A) and Omicron (Panel B) variants.** The panel on the left combines the results in all 10 replicates shown on the right.

**Supplementary Figure S11. Density of viral migration events across the US–Mexico border and international travels.** Probability density of international viral migration events between California and Mexico are represented in green and red. Blue and yellow lines represent the estimated counts of international travel (secondary y-axis) from the United States toward Mexico (blue) and Mexico toward the US (yellow) over time from the Facebook mobility data. Travel pattern edges between the United States and Mexico were provided by Facebook [28].

**Supplementary Material.** Phylogenies for each iteration and clade are available upon request to the authors.

**Supplementary Table S1. Distribution of full-length SARS-CoV2 genomes by county sampled in California and by state sampled in Mexico in 2021-2022. Panel A: Delta variant; Panel B: Omicron variant.**

| A. Delta        |                     |                     |            |                     |                    |                   |
|-----------------|---------------------|---------------------|------------|---------------------|--------------------|-------------------|
| Region          | State or County     | Number of sequences | Percentage | First sampling date | Last sampling date | Sampling duration |
| Mexico          | Guanajuato          | 1,138               | 1.031      | 2021-06-09          | 2022-01-04         | 209 days          |
|                 | Queretaro           | 543                 | 0.492      | 2021-06-16          | 2022-01-05         | 203 days          |
|                 | San Luis Potosi     | 345                 | 0.313      | 2021-06-20          | 2022-01-03         | 197 days          |
|                 | Zacatecas           | 386                 | 0.350      | 2021-06-14          | 2022-01-11         | 211 days          |
|                 | Estado de Mexico    | 2,149               | 1.947      | 2021-05-20          | 2022-01-05         | 230 days          |
|                 | Mexico City         | 5,209               | 4.719      | 2021-01-27          | 2022-01-17         | 355 days          |
|                 | Morelos             | 386                 | 0.350      | 2021-01-21          | 2021-12-23         | 336 days          |
|                 | Morelos             | 386                 | 0.350      | 2021-01-21          | 2021-12-23         | 336 days          |
|                 | Hidalgo             | 522                 | 0.473      | 2021-06-10          | 2022-01-11         | 215 days          |
|                 | Puebla              | 419                 | 0.380      | 2021-05-23          | 2021-12-26         | 217 days          |
|                 | Tlaxcala            | 95                  | 0.086      | 2021-06-20          | 2021-12-30         | 193 days          |
|                 | Veracruz            | 790                 | 0.716      | 2021-06-08          | 2021-12-27         | 202 days          |
|                 | Coahuila            | 599                 | 0.543      | 2021-06-30          | 2022-01-03         | 187 days          |
|                 | Nuevo Leon          | 802                 | 0.727      | 2021-05-22          | 2021-12-31         | 223 days          |
|                 | Tamaulipas          | 530                 | 0.480      | 2021-07-02          | 2022-01-06         | 188 days          |
|                 | Baja California     | 1,378               | 1.248      | 2021-06-12          | 2022-01-04         | 206 days          |
|                 | Baja California Sur | 433                 | 0.392      | 2021-05-15          | 2022-01-04         | 234 days          |
|                 | Chihuahua           | 625                 | 0.566      | 2021-06-09          | 2022-01-03         | 208 days          |
|                 | Durango             | 233                 | 0.211      | 2021-06-24          | 2022-01-06         | 196 days          |
|                 | Sinaloa             | 1,136               | 1.029      | 2021-05-06          | 2022-01-03         | 242 days          |
|                 | Sonora              | 733                 | 0.664      | 2021-06-15          | 2021-12-31         | 199 days          |
|                 | Campeche            | 373                 | 0.338      | 2021-06-14          | 2021-12-18         | 187 days          |
|                 | Quintana Roo        | 650                 | 0.589      | 2021-05-17          | 2022-01-02         | 230 days          |
|                 | Tabasco             | 871                 | 0.789      | 2021-06-17          | 2021-12-17         | 183 days          |
|                 | Yucatan             | 928                 | 0.841      | 2021-06-08          | 2022-01-09         | 215 days          |
|                 | Chiapas             | 352                 | 0.319      | 2021-06-30          | 2021-12-27         | 180 days          |
|                 | Guerrero            | 147                 | 0.133      | 2021-05-16          | 2021-12-24         | 222 days          |
|                 | Oaxaca              | 241                 | 0.218      | 2021-06-21          | 2022-01-06         | 199 days          |
|                 | Colima              | 265                 | 0.240      | 2021-06-25          | 2022-01-02         | 191 days          |
|                 | Jalisco             | 788                 | 0.714      | 2021-04-21          | 2022-01-04         | 258 days          |
|                 | Michoacan           | 440                 | 0.399      | 2021-05-11          | 2021-12-30         | 233 days          |
|                 | Nayarit             | 184                 | 0.167      | 2021-06-28          | 2022-01-03         | 189 days          |
|                 | Alameda             | 4,108               | 3.722      | 2021-01-24          | 2021-12-19         | 329 days          |
|                 | Alpine              | 2                   | 0.002      | 2021-09-07          | 2021-09-14         | 7 days            |
|                 | Amador              | 295                 | 0.267      | 2021-06-07          | 2021-12-11         | 187 days          |
|                 | Butte               | 547                 | 0.496      | 2021-06-14          | 2022-01-03         | 203 days          |
|                 | Calaveras           | 208                 | 0.188      | 2021-07-03          | 2021-12-18         | 168 days          |
|                 | Colusa              | 9                   | 0.008      | 2021-08-05          | 2021-12-01         | 118 days          |
|                 | Contra Costa        | 2,371               | 2.148      | 2021-04-13          | 2021-12-27         | 258 days          |
|                 | Del Norte           | 58                  | 0.053      | 2021-07-22          | 2021-12-06         | 137 days          |
|                 | El Dorado           | 512                 | 0.464      | 2021-04-29          | 2021-12-17         | 232 days          |
|                 | Fresno              | 2,871               | 2.601      | 2021-04-20          | 2021-12-30         | 254 days          |
|                 | Glenn               | 137                 | 0.124      | 2021-07-27          | 2021-12-04         | 130 days          |
|                 | Humboldt            | 816                 | 0.739      | 2021-06-03          | 2021-12-30         | 210 days          |
| Imperial        | 375                 | 0.340               | 2021-06-14 | 2021-12-31          | 200 days           |                   |
| Inyo            | 59                  | 0.053               | 2021-07-23 | 2021-12-07          | 137 days           |                   |
| Kern            | 1,135               | 1.028               | 2021-07-11 | 2021-12-26          | 168 days           |                   |
| Kings           | 859                 | 0.778               | 2021-06-07 | 2021-12-14          | 190 days           |                   |
| Lake            | 409                 | 0.371               | 2021-05-26 | 2021-12-30          | 218 days           |                   |
| Lassen          | 6                   | 0.005               | 2021-08-03 | 2021-08-25          | 22 days            |                   |
| Los Angeles     | 8,066               | 7.308               | 2021-01-06 | 2022-01-03          | 362 days           |                   |
| Madera          | 720                 | 0.652               | 2021-05-04 | 2021-12-30          | 240 days           |                   |
| Marin           | 338                 | 0.306               | 2021-06-10 | 2021-12-18          | 191 days           |                   |
| Mariposa        | 134                 | 0.121               | 2021-07-22 | 2021-12-04          | 135 days           |                   |
| Mendocino       | 739                 | 0.670               | 2021-04-20 | 2021-12-22          | 246 days           |                   |
| Merced          | 817                 | 0.740               | 2021-04-27 | 2021-12-23          | 240 days           |                   |
| Mono            | 128                 | 0.116               | 2021-07-27 | 2021-12-09          | 135 days           |                   |
| Monterey        | 1,098               | 0.995               | 2021-06-12 | 2022-01-09          | 211 days           |                   |
| Napa            | 299                 | 0.271               | 2021-06-10 | 2021-12-17          | 190 days           |                   |
| Nevada          | 949                 | 0.769               | 2021-05-07 | 2021-12-23          | 230 days           |                   |
| Nevada          | 849                 | 0.769               | 2021-05-07 | 2021-12-23          | 230 days           |                   |
| Orange          | 2,677               | 2.425               | 2021-05-02 | 2022-01-07          | 250 days           |                   |
| Placer          | 1,188               | 1.076               | 2021-05-02 | 2022-01-03          | 246 days           |                   |
| Plumas          | 4                   | 0.004               | 2021-06-02 | 2021-10-18          | 138 days           |                   |
| Riverside       | 1,573               | 1.425               | 2021-06-03 | 2022-01-04          | 215 days           |                   |
| Sacramento      | 5,482               | 4.967               | 2021-04-05 | 2022-01-06          | 276 days           |                   |
| San Benito      | 236                 | 0.214               | 2021-07-05 | 2022-01-03          | 182 days           |                   |
| San Bernardino  | 1,519               | 1.376               | 2021-04-12 | 2021-12-27          | 259 days           |                   |
| San Diego       | 20,250              | 18.346              | 2021-02-09 | 2022-01-14          | 339 days           |                   |
| San Francisco   | 2,557               | 2.317               | 2021-04-15 | 2022-01-03          | 263 days           |                   |
| San Joaquin     | 2,399               | 2.173               | 2021-05-04 | 2022-01-08          | 249 days           |                   |
| San Luis Obispo | 1,952               | 1.768               | 2021-04-26 | 2022-01-17          | 266 days           |                   |
| San Mateo       | 722                 | 0.654               | 2021-05-01 | 2021-12-18          | 231 days           |                   |
| Santa Barbara   | 1,259               | 1.141               | 2021-06-16 | 2022-01-06          | 204 days           |                   |
| Santa Clara     | 6,344               | 5.748               | 2021-04-07 | 2021-12-30          | 287 days           |                   |
| Santa Cruz      | 917                 | 0.831               | 2021-06-14 | 2022-01-06          | 206 days           |                   |
| Shasta          | 242                 | 0.219               | 2021-06-08 | 2021-12-03          | 178 days           |                   |
| Sierra          | 7                   | 0.006               | 2021-08-10 | 2021-12-01          | 113 days           |                   |
| Siskiyou        | 36                  | 0.033               | 2021-05-21 | 2021-12-15          | 208 days           |                   |
| Solano          | 1,243               | 1.126               | 2021-04-19 | 2021-12-22          | 247 days           |                   |
| Sonoma          | 1,849               | 1.675               | 2021-04-27 | 2022-01-10          | 258 days           |                   |
| Stanislaus      | 1,755               | 1.590               | 2021-04-05 | 2021-12-20          | 259 days           |                   |
| Sutter          | 260                 | 0.236               | 2021-05-01 | 2021-12-27          | 240 days           |                   |
| Tehama          | 199                 | 0.180               | 2021-05-24 | 2021-12-03          | 193 days           |                   |
| Trinity         | 36                  | 0.033               | 2021-07-29 | 2021-12-02          | 126 days           |                   |
| Tulare          | 751                 | 0.680               | 2021-05-29 | 2021-12-30          | 215 days           |                   |
| Tuolumne        | 524                 | 0.475               | 2021-06-24 | 2021-12-18          | 177 days           |                   |
| Ventura         | 1,208               | 1.094               | 2021-05-05 | 2021-12-29          | 238 days           |                   |
| Yolo            | 1,272               | 1.152               | 2021-04-05 | 2021-12-27          | 266 days           |                   |
| Yuba            | 262                 | 0.237               | 2021-05-06 | 2021-12-18          | 226 days           |                   |

| B. Omicron      |                     |                     |            |                     |                    |                   |
|-----------------|---------------------|---------------------|------------|---------------------|--------------------|-------------------|
| Region          | State or County     | Number of sequences | Percentage | First sampling date | Last sampling date | Sampling duration |
| Mexico          | Guanajuato          | 24                  | 0.249740   | 2021-12-27          | 2022-01-05         | 9 days            |
|                 | Queretaro           | 50                  | 0.520291   | 2021-12-15          | 2022-01-06         | 22 days           |
|                 | San Luis Potosi     | 19                  | 0.197711   | 2021-12-07          | 2022-01-06         | 30 days           |
|                 | Zacatecas           | 49                  | 0.509886   | 2021-12-14          | 2022-01-07         | 24 days           |
|                 | Estado de Mexico    | 278                 | 2.892820   | 2021-12-02          | 2022-01-22         | 51 days           |
|                 | Mexico City         | 1,563               | 16.264308  | 2021-11-16          | 2022-01-28         | 73 days           |
|                 | Morelos             | 2                   | 0.020812   | 2021-12-28          | 2022-01-08         | 11 days           |
|                 | Morelos             | 2                   | 0.020812   | 2021-12-28          | 2022-01-08         | 11 days           |
|                 | Hidalgo             | 26                  | 0.270552   | 2021-12-19          | 2022-01-11         | 23 days           |
|                 | Puebla              | 18                  | 0.187305   | 2021-12-09          | 2022-01-09         | 31 days           |
|                 | Tlaxcala            | 14                  | 0.145682   | 2021-12-28          | 2022-01-06         | 9 days            |
|                 | Veracruz            | 51                  | 0.530697   | 2021-12-18          | 2022-01-10         | 23 days           |
|                 | Coahuila            | 18                  | 0.187305   | 2021-12-22          | 2022-01-06         | 15 days           |
|                 | Nuevo Leon          | 110                 | 1.144641   | 2021-12-18          | 2022-01-08         | 21 days           |
|                 | Tamaulipas          | 150                 | 1.560874   | 2021-12-03          | 2022-01-10         | 38 days           |
|                 | Baja California     | 161                 | 1.675338   | 2021-12-13          | 2022-01-06         | 24 days           |
|                 | Baja California Sur | 49                  | 0.509886   | 2021-12-14          | 2022-01-05         | 22 days           |
|                 | Chihuahua           | 64                  | 0.665973   | 2021-12-24          | 2022-01-03         | 10 days           |
|                 | Durango             | 17                  | 0.176899   | 2021-12-24          | 2022-01-07         | 14 days           |
|                 | Sinaloa             | 191                 | 1.987513   | 2021-12-12          | 2022-01-07         | 26 days           |
|                 | Sonora              | 39                  | 0.405827   | 2021-12-21          | 2022-01-30         | 9 days            |
|                 | Campeche            | 8                   | 0.083247   | 2022-01-01          | 2022-01-02         | 1 days            |
|                 | Quintana Roo        | 152                 | 1.581686   | 2021-12-15          | 2022-01-10         | 26 days           |
|                 | Tabasco             | 121                 | 1.259105   | 2021-12-15          | 2022-01-10         | 26 days           |
|                 | Yucatan             | 234                 | 2.434964   | 2021-12-14          | 2022-01-10         | 27 days           |
|                 | Chiapas             | 39                  | 0.405827   | 2021-12-15          | 2022-01-10         | 26 days           |
|                 | Guerrero            | 101                 | 1.050989   | 2021-12-21          | 2022-01-10         | 20 days           |
|                 | Oaxaca              | 65                  | 0.676379   | 2021-12-21          | 2022-01-10         | 20 days           |
|                 | Colima              | 10                  | 0.104058   | 2021-12-22          | 2022-01-03         | 12 days           |
|                 | Jalisco             | 269                 | 2.799168   | 2021-12-13          | 2022-01-06         | 24 days           |
|                 | Michoacan           | 13                  | 0.135276   | 2021-12-24          | 2021-12-31         | 7 days            |
|                 | Nayarit             | 49                  | 0.509886   | 2021-12-26          | 2022-01-05         | 8 days            |
| Alameda         | 37                  | 0.385016            | 2021-11-30 | 2022-01-12          | 43 days            |                   |
| Butte           | 72                  | 0.749220            | 2021-12-17 | 2022-01-14          | 28 days            |                   |
| Calaveras       | 1                   | 0.010406            | 2021-12-28 | 2021-12-28          | 0 days             |                   |
| Contra Costa    | 30                  | 0.312175            | 2021-12-15 | 2022-01-22          | 38 days            |                   |
| El Dorado       | 8                   | 0.083247            | 2021-12-08 | 2022-01-09          | 32 days            |                   |
| Fresno          | 7                   | 0.072841            | 2021-12-09 | 2022-01-03          | 25 days            |                   |
| Glenn           | 1                   | 0.010406            | 2022-01-02 | 2022-01-02          | 0 days             |                   |
| Humboldt        | 7                   | 0.072841            | 2021-12-30 | 2022-01-02          | 3 days             |                   |
| Imperial        | 20                  | 0.208117            | 2021-12-13 | 2022-01-20          | 38 days            |                   |
| Inyo            | 1                   | 0.010406            | 2021-12-25 | 2021-12-25          | 0 days             |                   |
| Kern            | 9                   | 0.093652            | 2021-12-14 | 2022-01-03          | 20 days            |                   |
| Lake            | 1                   | 0.010406            | 2021-12-27 | 2021-12-27          | 0 days             |                   |
| Los Angeles     | 554                 | 5.764828            | 2021-11-27 | 2022-01-23          | 57 days            |                   |
| Madera          | 7                   | 0.072841            | 2021-12-29 | 2022-01-04          | 6 days             |                   |
| Marin           | 7                   | 0.072841            | 2021-12-16 | 2022-01-19          | 34 days            |                   |
| Mendocino       | 1                   | 0.010406            | 2021-12-14 | 2021-12-14          | 0 days             |                   |
| Merced          | 1                   | 0.010406            | 2021-12-26 | 2021-12-26          | 0 days             |                   |
| Monterey        | 182                 | 1.893861            | 2021-12-14 | 2022-01-09          | 26 days            |                   |
| Napa            | 1                   | 0.010406            | 2021-12-27 | 2021-12-27          | 0 days             |                   |
| Nevada          | 16                  | 0.166493            | 2021-12-08 | 2022-01-22          | 45 days            |                   |
| Nevada          | 16                  | 0.166493            | 2021-12-08 | 2022-01-22          | 45 days            |                   |
| Orange          | 208                 | 2.164412            | 2021-12-07 | 2022-01-22          | 46 days            |                   |
| Placer          | 24                  | 0.249740            | 2021-12-21 | 2022-01-14          | 24 days            |                   |
| Riverside       | 58                  | 0.603538            | 2021-12-13 | 2022-01-12          | 30 days            |                   |
| Sacramento      | 92                  | 0.957336            | 2021-12-02 | 2022-01-16          | 45 days            |                   |
| San Benito      | 1                   | 0.010406            | 2021-12-27 | 2021-12-27          | 0 days             |                   |
| San Bernardino  | 47                  | 0.489074            | 2021-12-08 | 2022-01-16          | 39 days            |                   |
| San Diego       | 2,779               | 28.917794           | 2021-12-07 | 2022-01-20          | 44 days            |                   |
| San Francisco   | 192                 | 1.997919            | 2021-11-28 | 2022-01-04          | 37 days            |                   |
| San Joaquin     | 203                 | 2.112383            | 2021-12-19 | 2022-01-11          | 23 days            |                   |
| San Luis Obispo | 215                 | 2.237253            | 2021-11-30 | 2022-01-20          | 51 days            |                   |
| San Mateo       | 20                  | 0.208117            | 2021-12-07 | 2022-01-23          | 47 days            |                   |
| Santa Barbara   | 43                  | 0.447451            | 2021-12-16 | 2022-01-04          | 19 days            |                   |
| Santa Clara     | 340                 | 3.537981            | 2021-12-02 | 2022-01-13          | 42 days            |                   |
| Santa Cruz      | 17                  | 0.176899            | 2021-12-16 | 2022-01-10          | 25 days            |                   |
| Solano          | 4                   | 0.041623            | 2021-12-17 | 2022-01-09          | 23 days            |                   |
| Sonoma          | 243                 | 2.528616            | 2021-12-13 | 2022-01-16          | 34 days            |                   |
| Stanislaus      | 6                   | 0.062435            | 2021-12-14 | 2022-01-10          | 27 days            |                   |
|                 | 1                   | 0.010406            | 2021-12-28 | 2021-12-28          | 0 days             |                   |
| Sutter          | 5                   | 0.050209            | 2021-12-14 | 2022-01-12          | 29 days            |                   |
|                 |                     |                     |            |                     |                    |                   |



**Supplementary Table S2.** Sampling overview of each replicate for Delta and Omicron.

| Variant | Replicates   | Number of sequences | Number of locations | Number of sequences in clades | Number of clades | Number of locations in clades | Number of clades above 5 | Number of dyads |
|---------|--------------|---------------------|---------------------|-------------------------------|------------------|-------------------------------|--------------------------|-----------------|
| Delta   | Replicate 1  | 746                 | 79                  | 559                           | 102              | 70                            | 33                       | 37              |
|         | Replicate 2  | 750                 | 76                  | 544                           | 98               | 70                            | 34                       | 44              |
|         | Replicate 3  | 747                 | 79                  | 537                           | 90               | 68                            | 34                       | 26              |
|         | Replicate 4  | 744                 | 81                  | 526                           | 94               | 71                            | 33                       | 43              |
|         | Replicate 5  | 751                 | 78                  | 550                           | 101              | 70                            | 31                       | 39              |
|         | Replicate 6  | 745                 | 78                  | 549                           | 102              | 70                            | 32                       | 48              |
|         | Replicate 7  | 753                 | 79                  | 555                           | 109              | 65                            | 30                       | 51              |
|         | Replicate 8  | 746                 | 80                  | 545                           | 113              | 68                            | 34                       | 46              |
|         | Replicate 9  | 744                 | 79                  | 563                           | 102              | 68                            | 27                       | 40              |
|         | Replicate 10 | 745                 | 79                  | 544                           | 99               | 69                            | 35                       | 39              |
| Omicron | Replicate 1  | 631                 | 63                  | 218                           | 66               | 23                            | 9                        | 42              |
|         | Replicate 2  | 643                 | 66                  | 207                           | 55               | 32                            | 10                       | 31              |
|         | Replicate 3  | 633                 | 64                  | 223                           | 70               | 27                            | 11                       | 34              |
|         | Replicate 4  | 635                 | 64                  | 238                           | 74               | 19                            | 10                       | 47              |
|         | Replicate 5  | 641                 | 60                  | 219                           | 70               | 26                            | 12                       | 48              |
|         | Replicate 6  | 647                 | 64                  | 198                           | 57               | 24                            | 12                       | 29              |
|         | Replicate 7  | 661                 | 64                  | 231                           | 70               | 31                            | 10                       | 43              |
|         | Replicate 8  | 641                 | 62                  | 233                           | 79               | 16                            | 8                        | 47              |
|         | Replicate 9  | 648                 | 65                  | 247                           | 82               | 28                            | 9                        | 51              |
|         | Replicate 10 | 640                 | 65                  | 211                           | 72               | 20                            | 7                        | 45              |

**Supplementary Table S3.** Skewness and kurtosis of the distribution of the external introduction events and viral migrations for Omicron and Delta variants.

|                         | <b>Variant</b> | <b>Skewness</b> | <b>Kurtosis</b> |
|-------------------------|----------------|-----------------|-----------------|
| <b>Introductions</b>    | Omicron        | -1.90415        | 13.8816         |
|                         | Delta          | 0.643226        | 3.57319         |
| <b>Migration events</b> | Omicron        | -0.289548       | 2.94777         |
|                         | Delta          | 0.888538        | 4.08022         |

**Supplementary Figure S1.** Map of publicly available SARS-CoV-2 sequences from California and Mexico that have been deposited in the GISAID database [12] as of January 31<sup>st</sup>, 2022, for Delta variant (panel A) and Omicron variant (panel B).

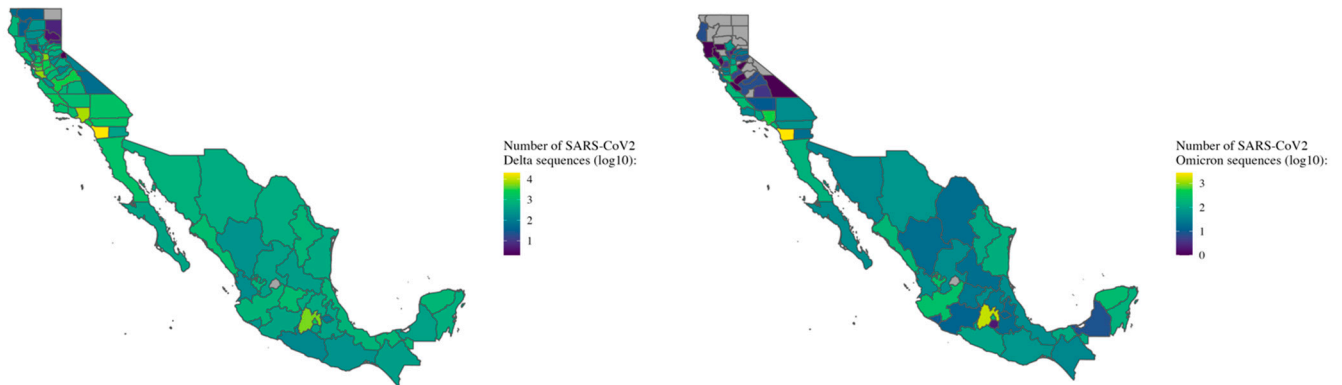

**Supplementary Figure S2. Number of COVID-19 confirmed cases in relation to full-length SARS-CoV2 genome sequences by location.**

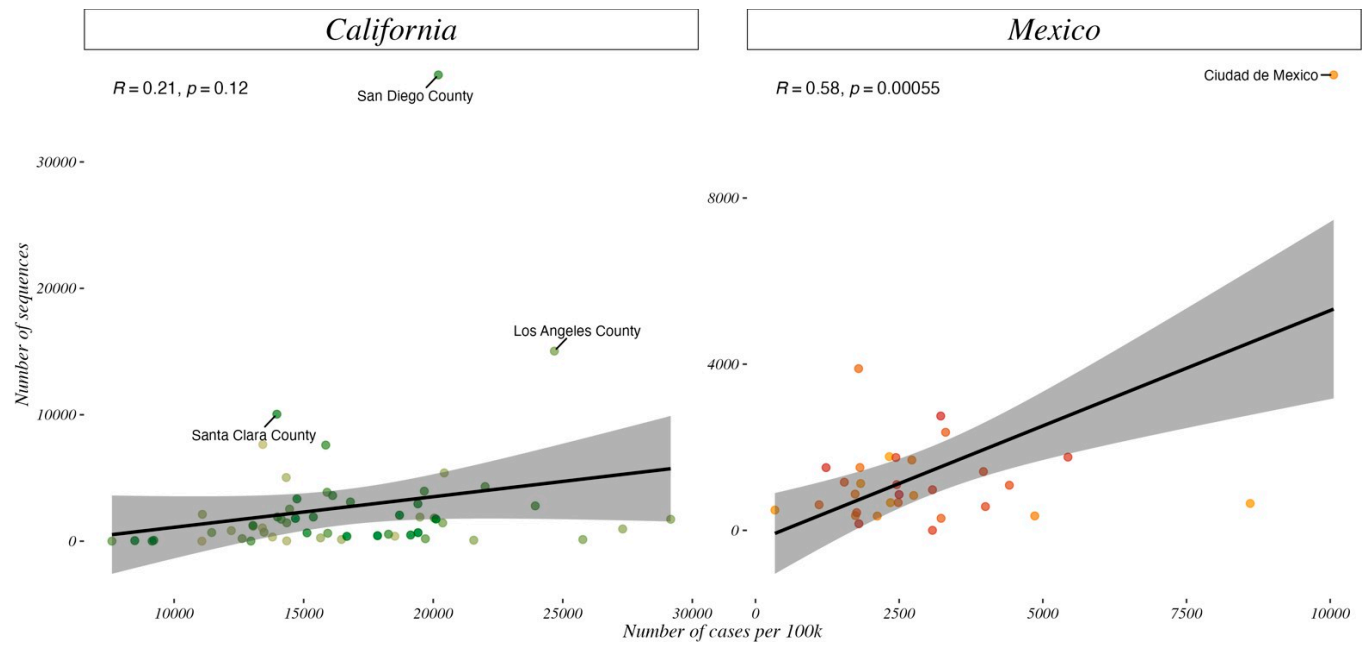

**Supplementary figure S3. Map of COVID-19 cases per 100,000 individuals up to January 31<sup>st</sup> 2022.**

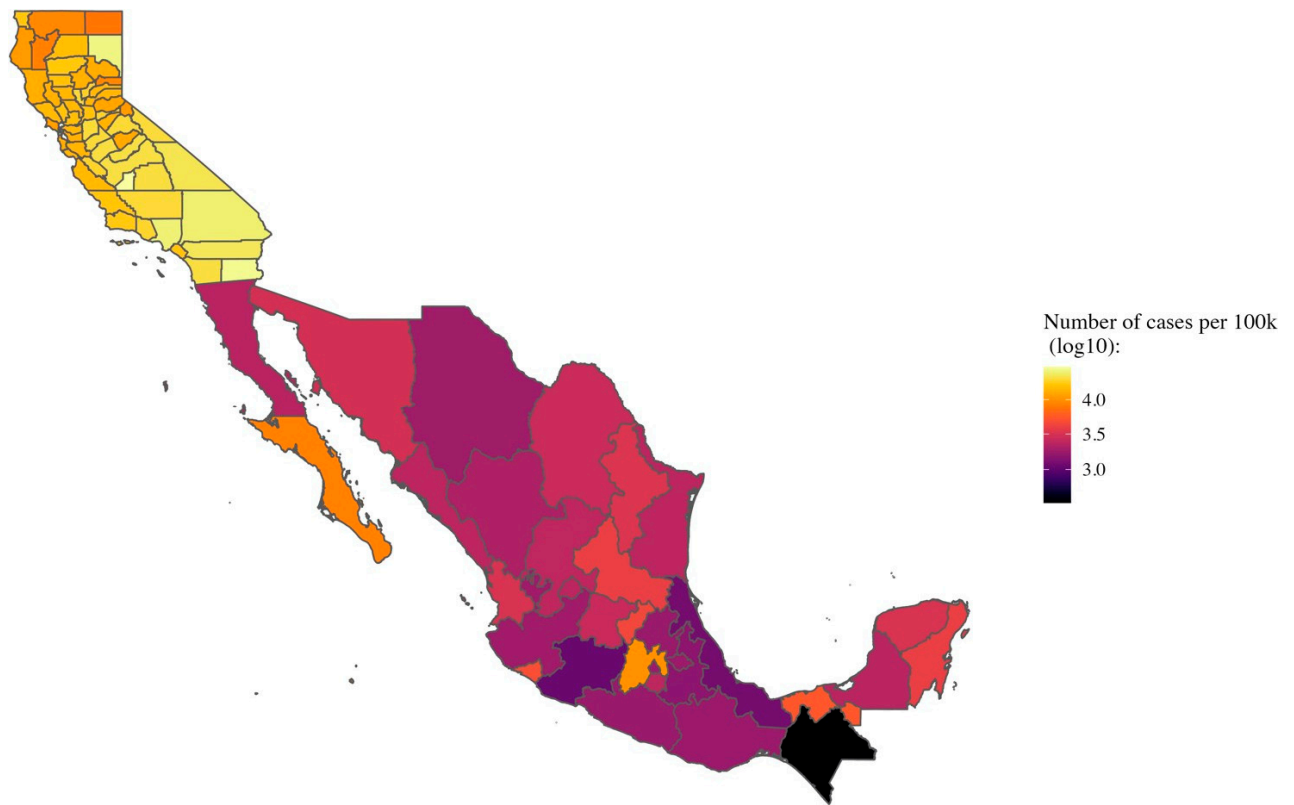

Supplementary figure S4. Visualization of Delta (A) and Omicron (B) genomes using MicroReact.

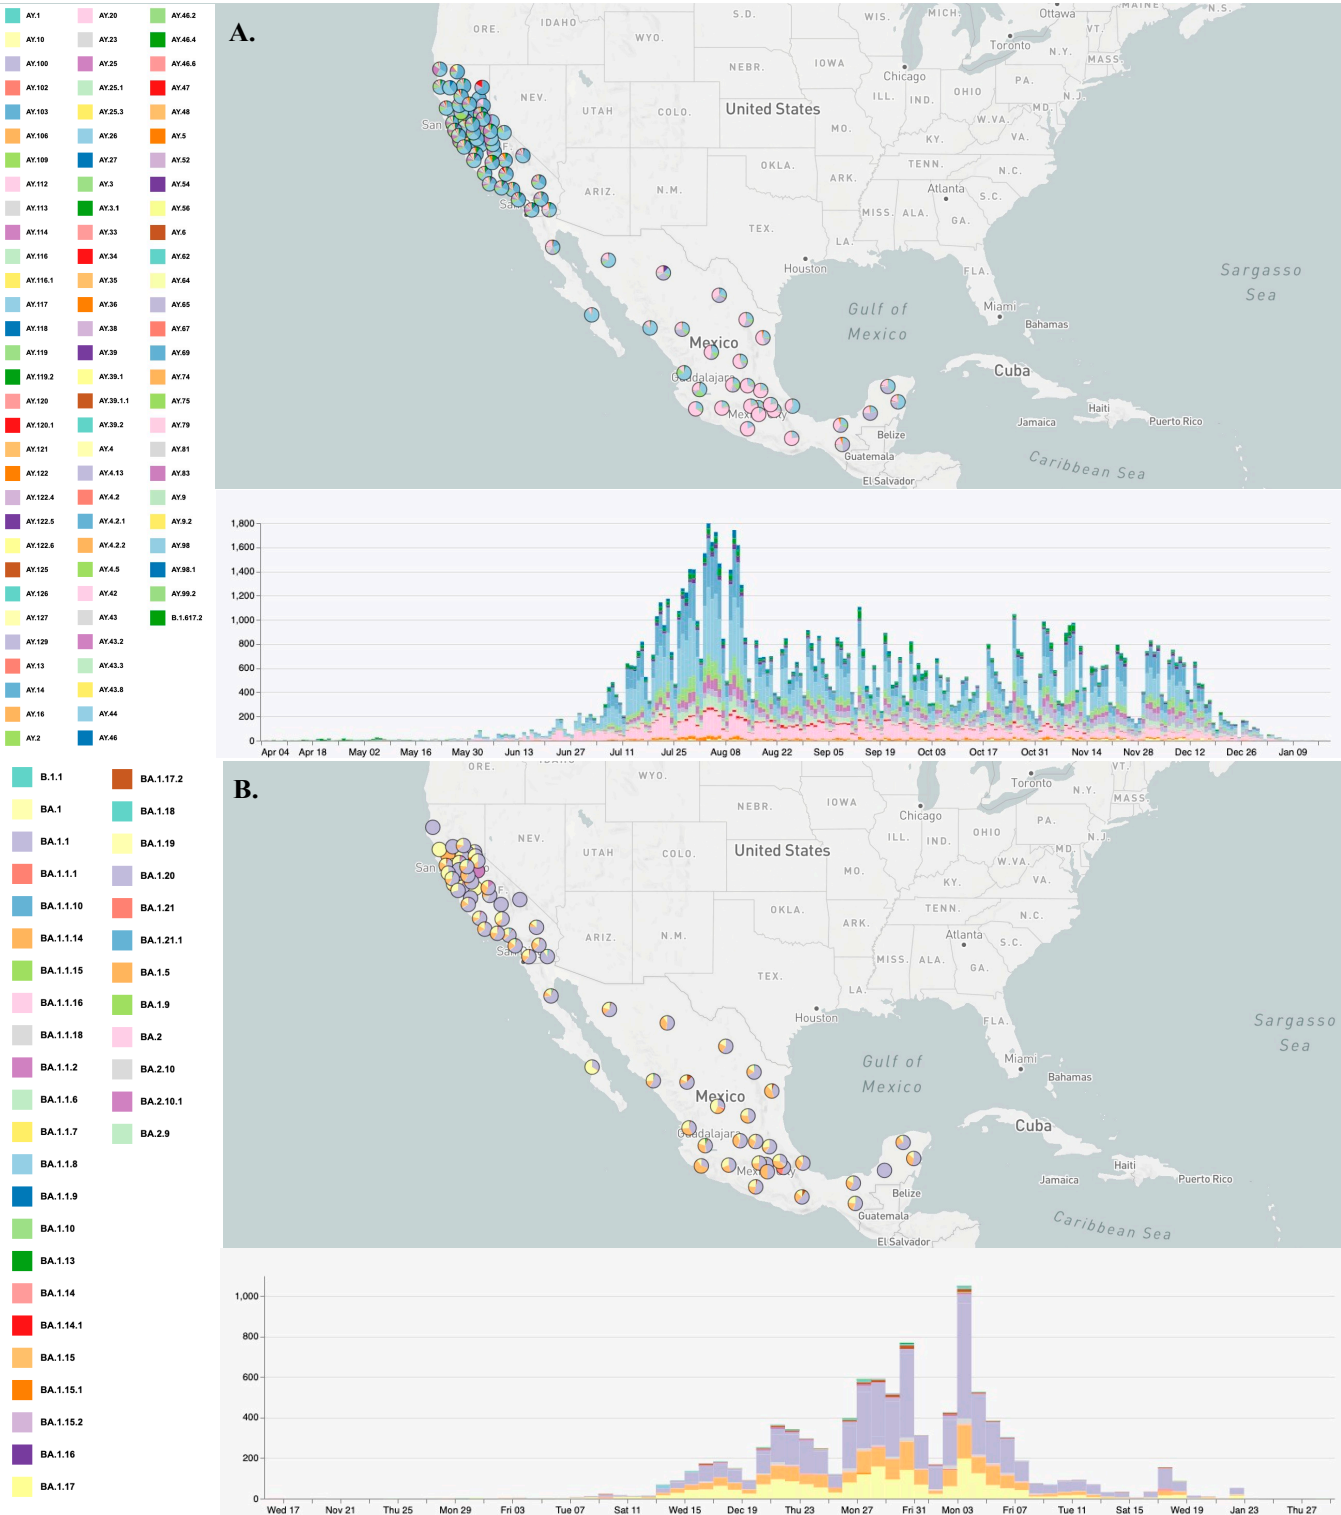



**Supplementary Figure S5. Density plots of external introductions of the identified clades for delta (Panel A) and Omicron (Panel B) variants for the 10 replicates.**

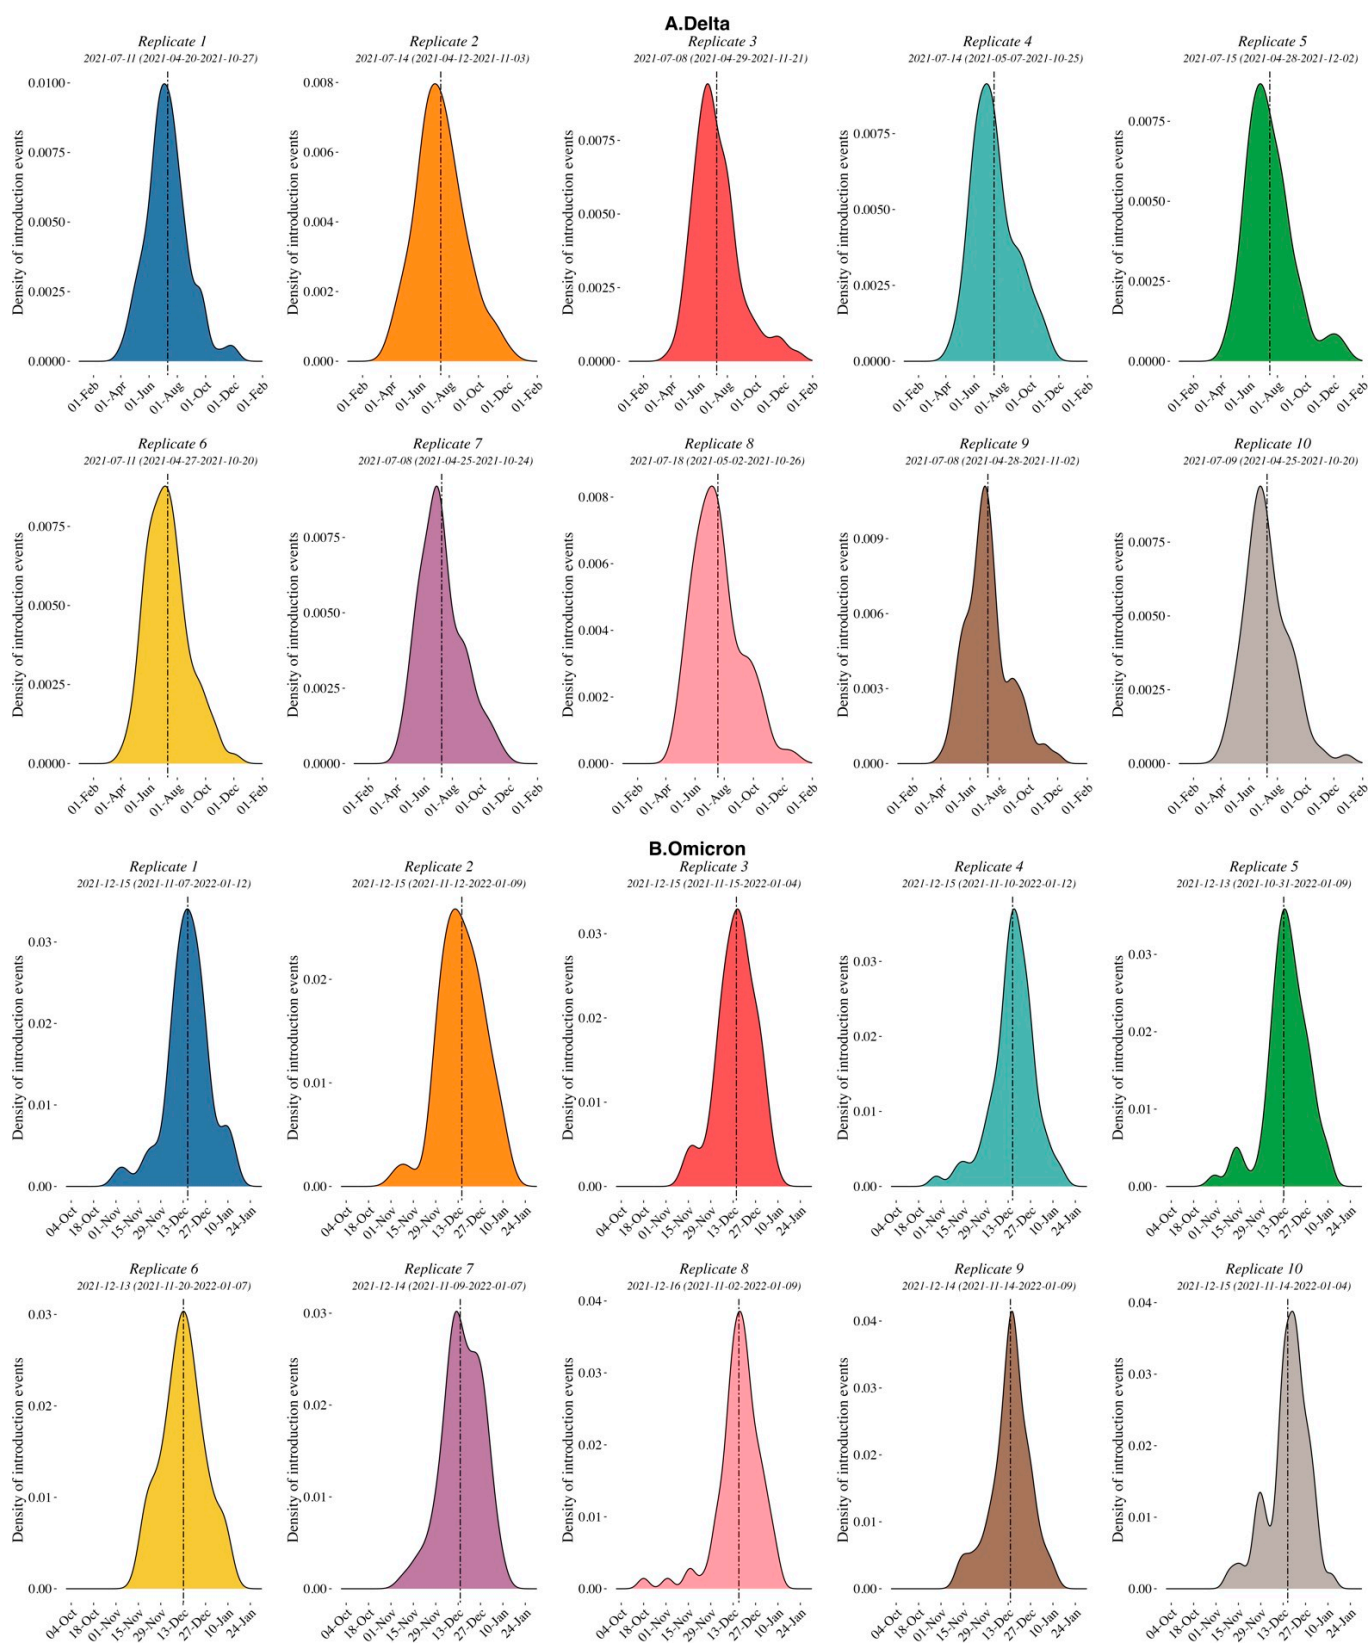



**Supplementary Figure S6. Map of migration events between location for Delta (Panel A) and Omicron (Panel B) variants.**

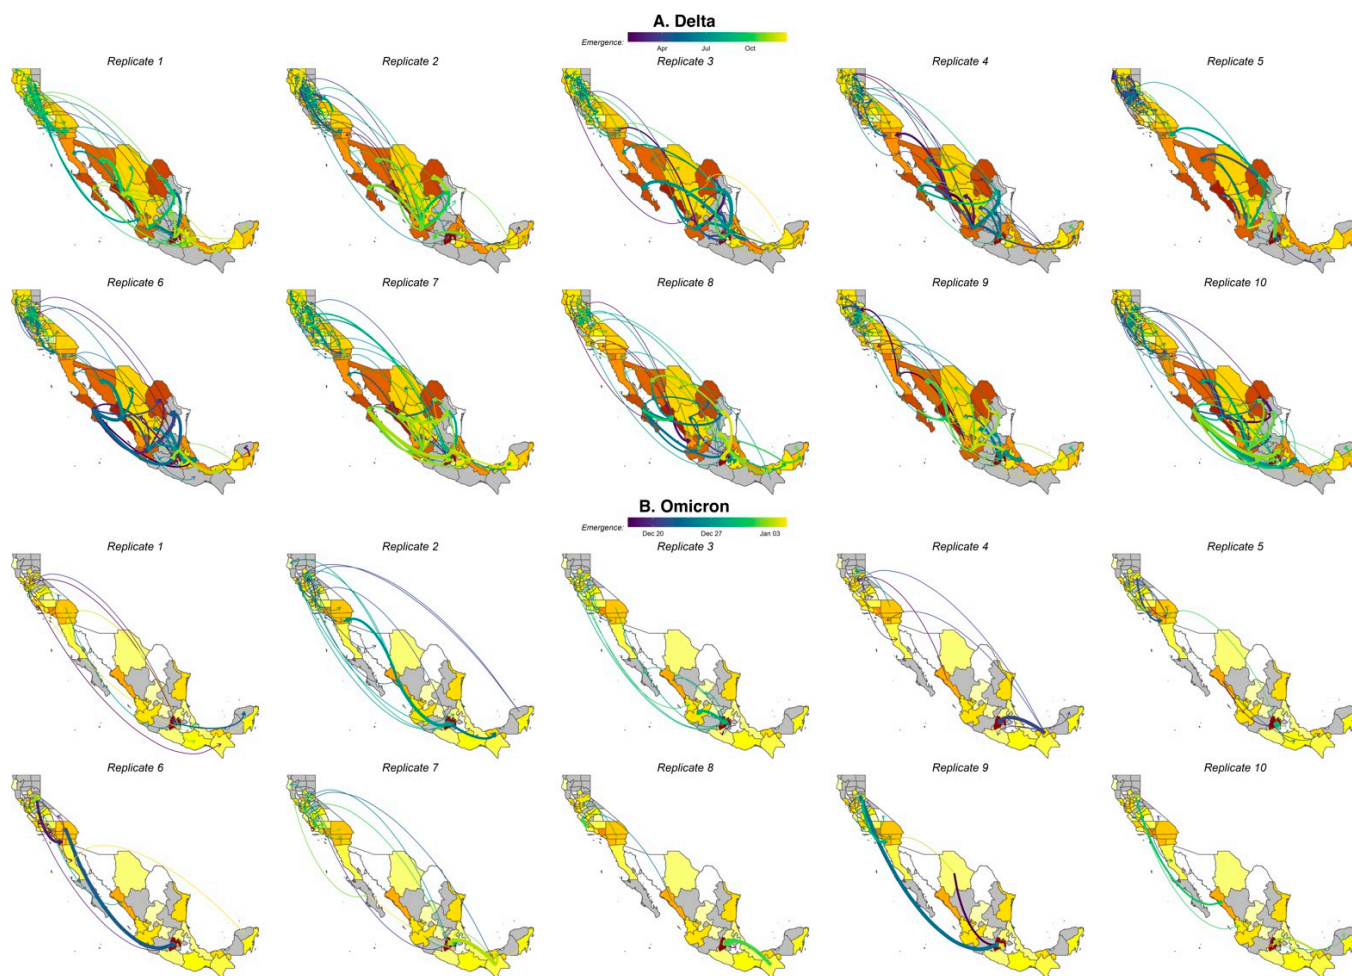

**Supplementary Figure S7. Proportion of viral migration events from each source location ('from') toward the recipient location ('to') for Delta (Panel A) and Omicron (Panel B) variants.**

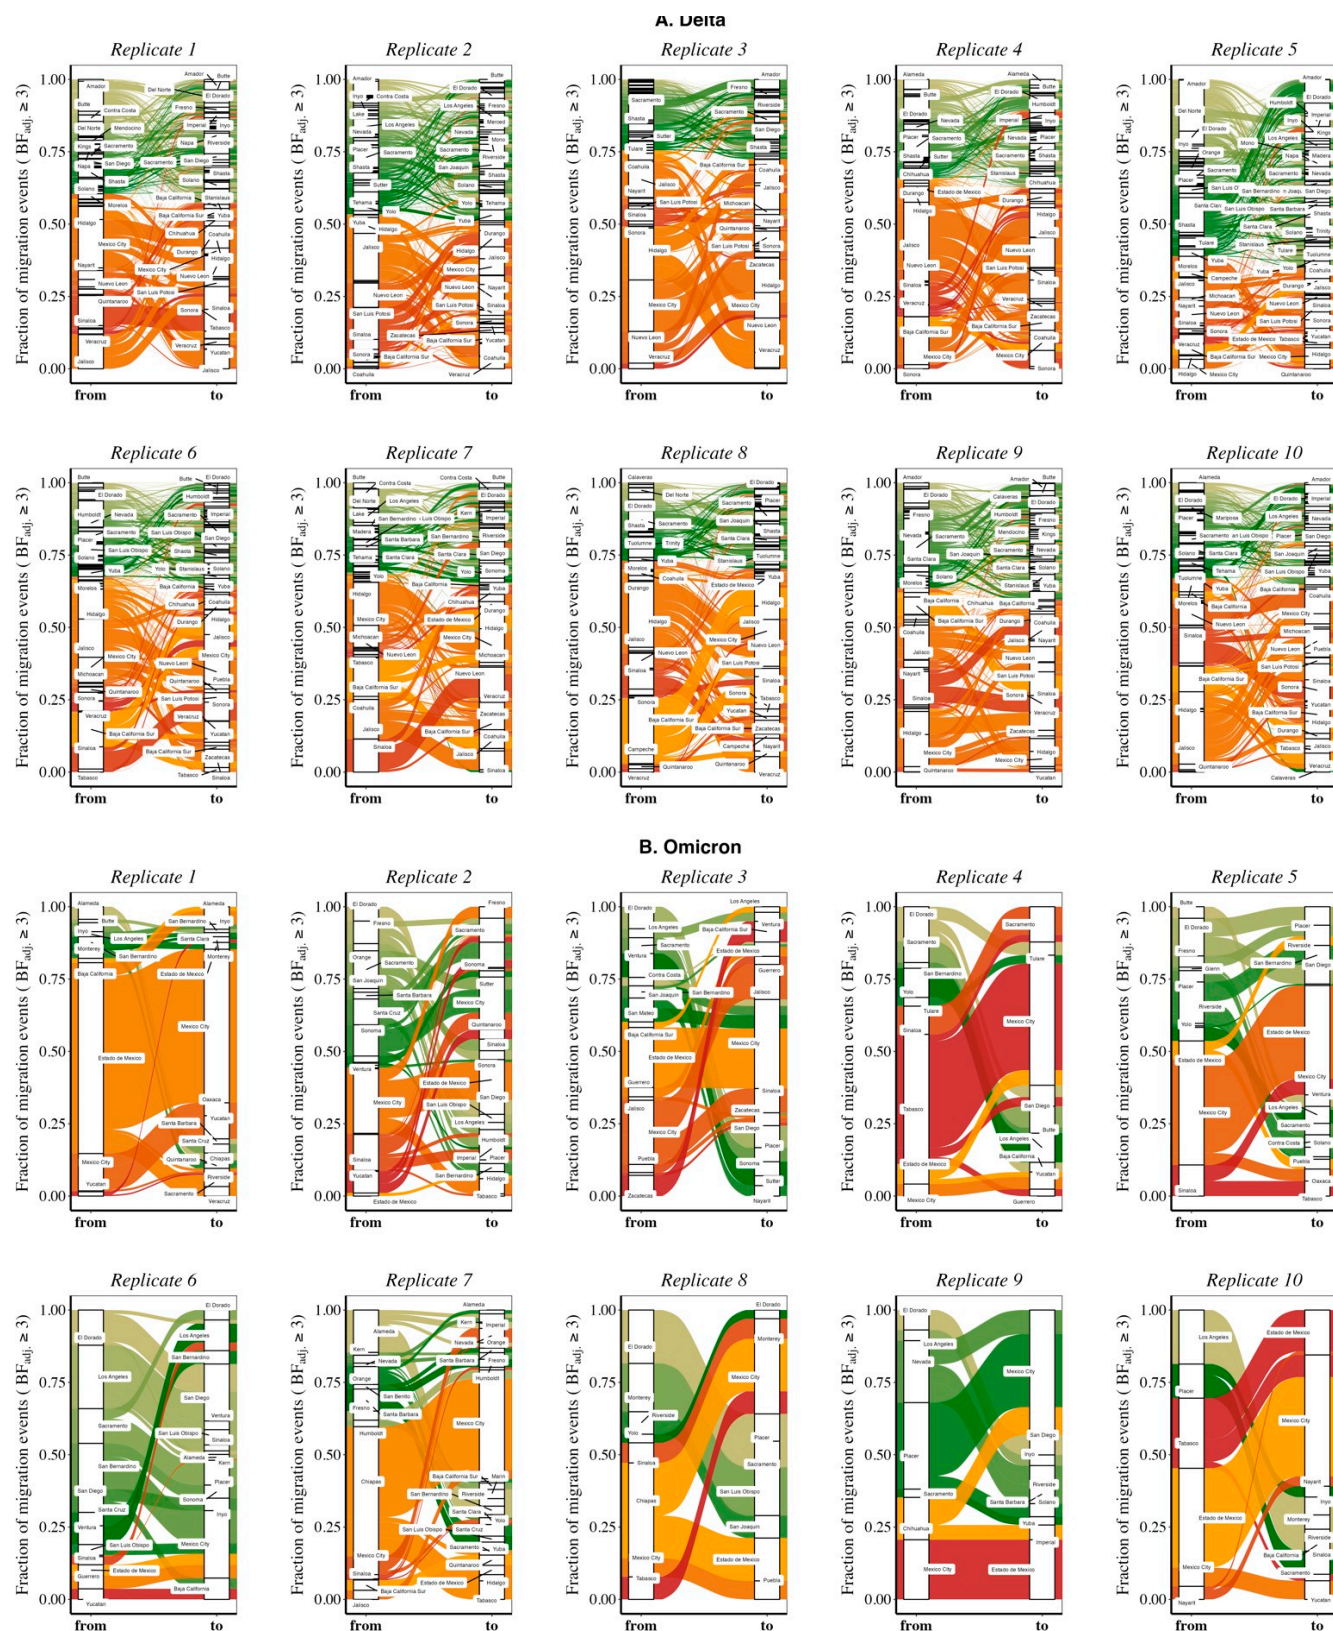



# Supplementary Figure S8. Probability Density of variant migration events between locations for Delta

(Panel A) and Omicron (Panel B) variants.

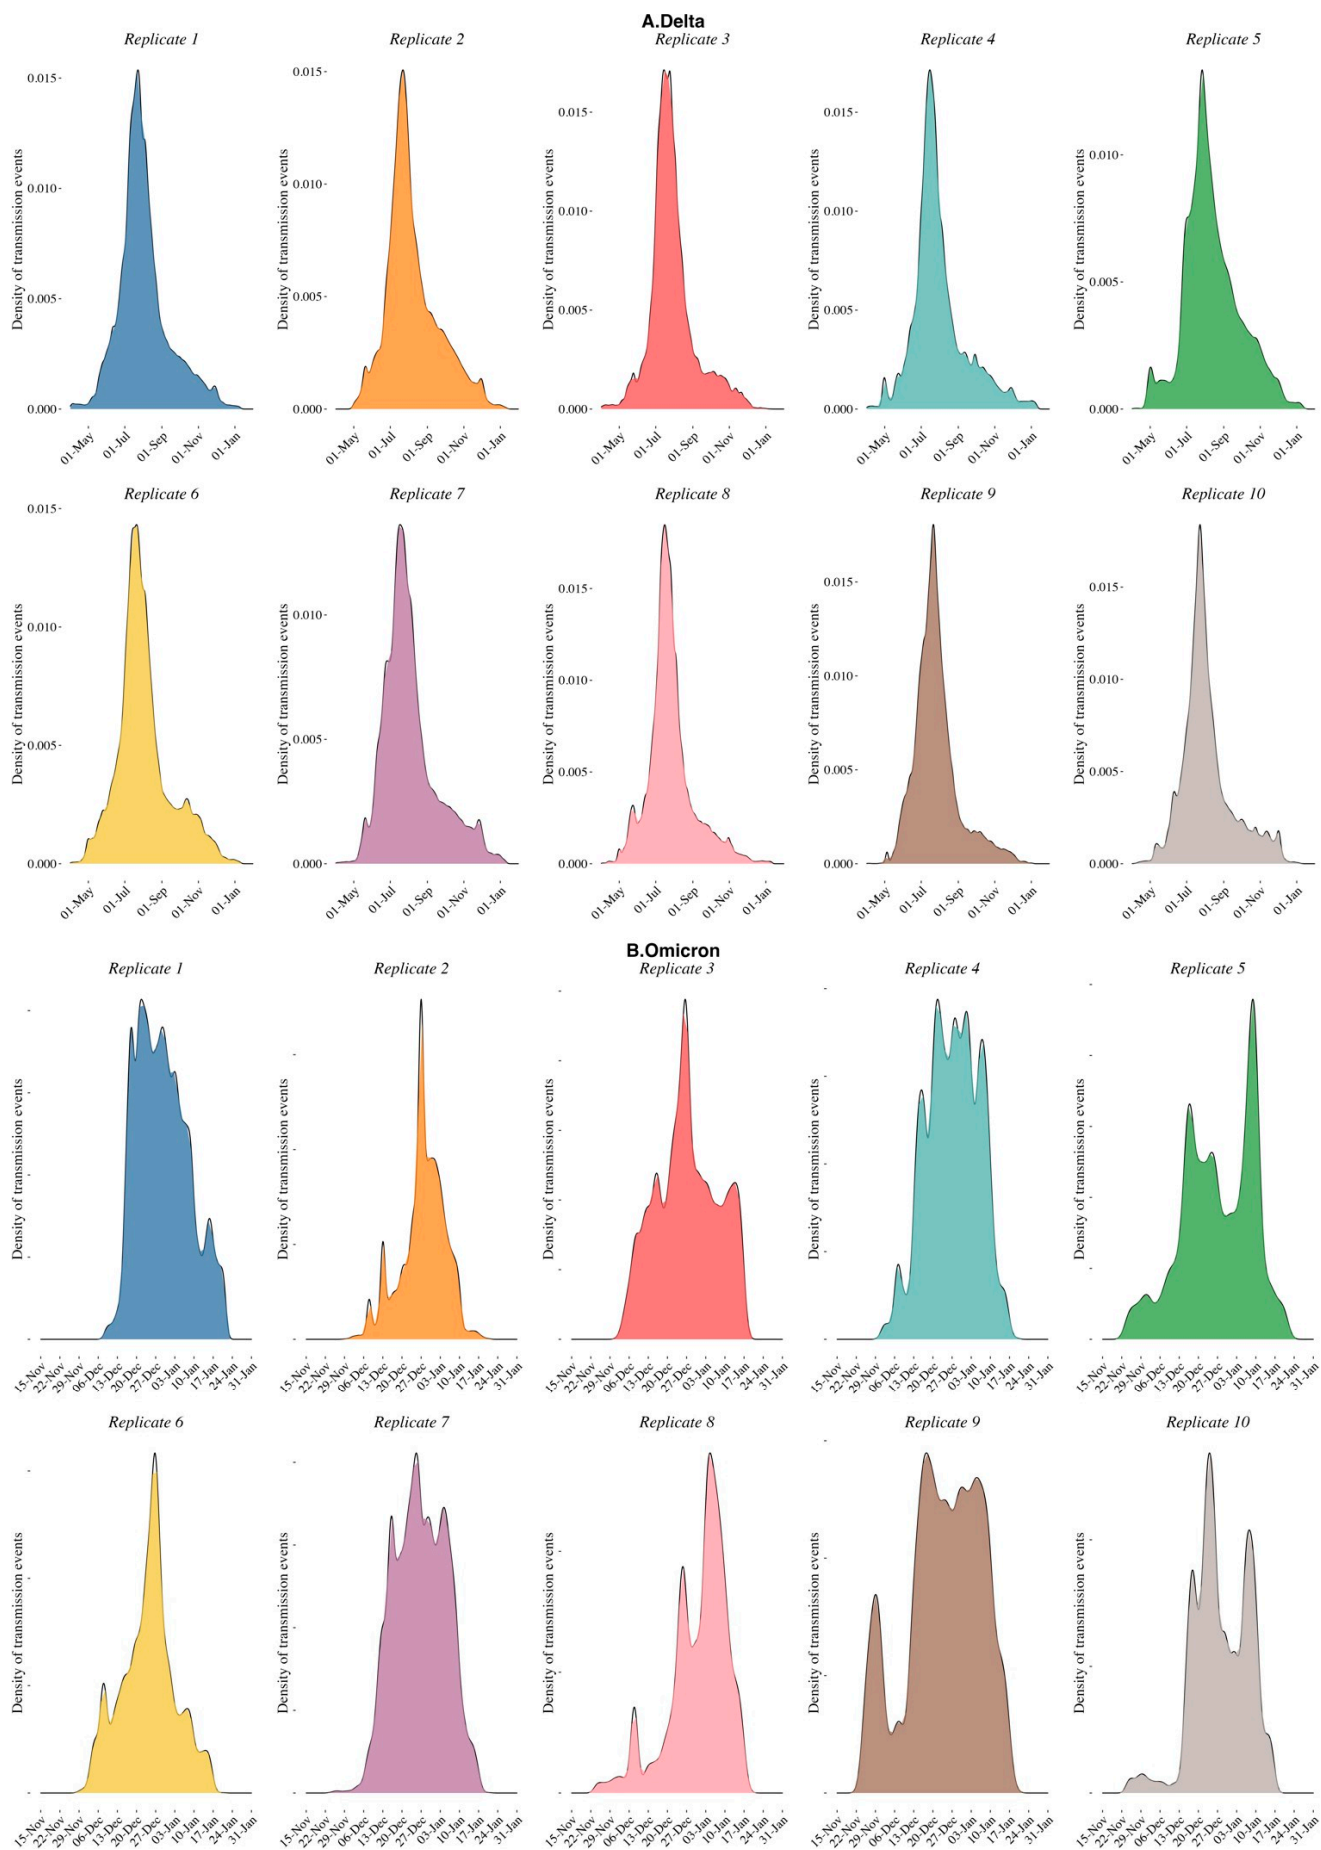

**Supplementary Figure S9. Relative contribution of national vs international transmission events to the Delta (Panel A) and Omicron (Panel B) epidemics overtime.**

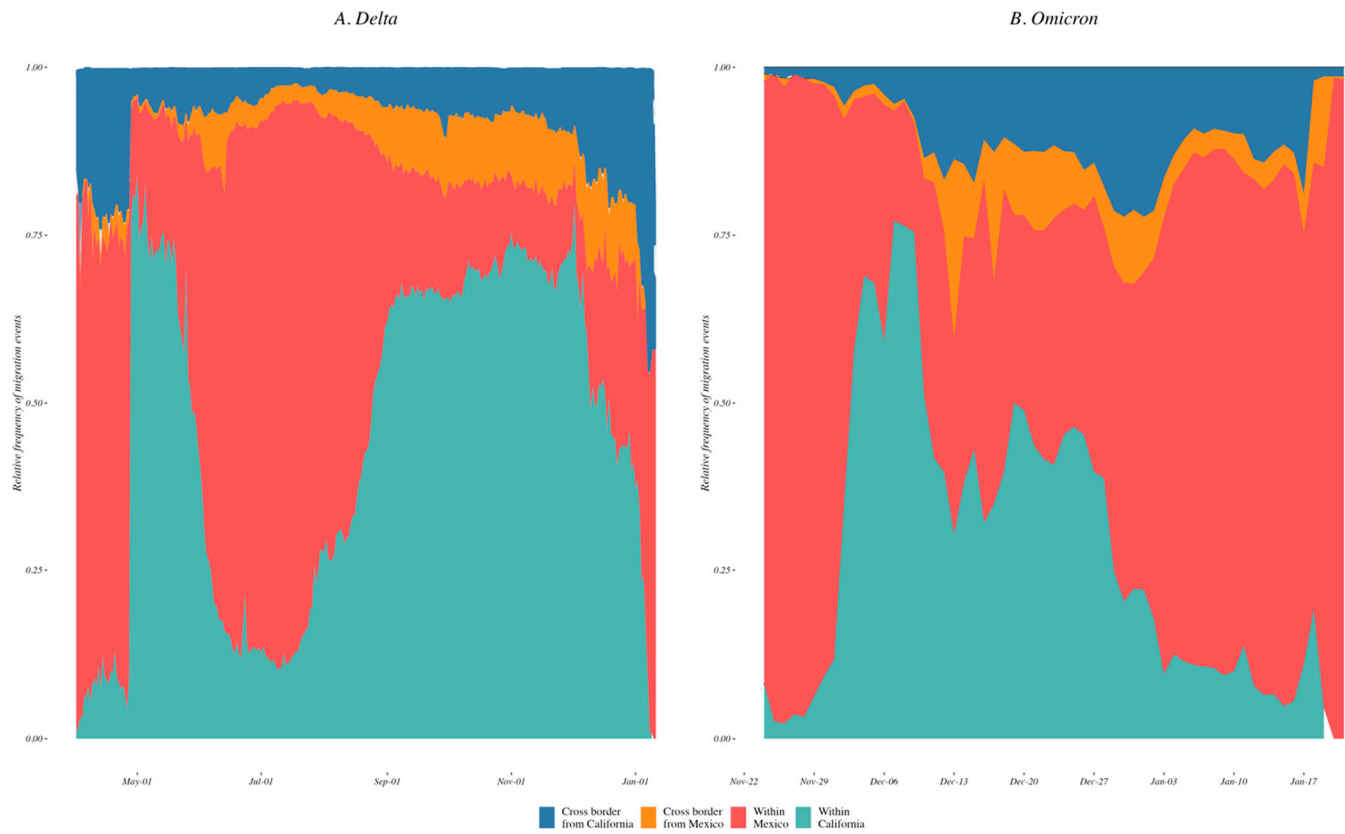

**Supplementary Figure S10. Distribution of the geographic distances of phylogenetic lineage movement events for Delta (A) and Omicron (B) variants.** The panel on the left combines the results of all 10 replicates shown on the right.

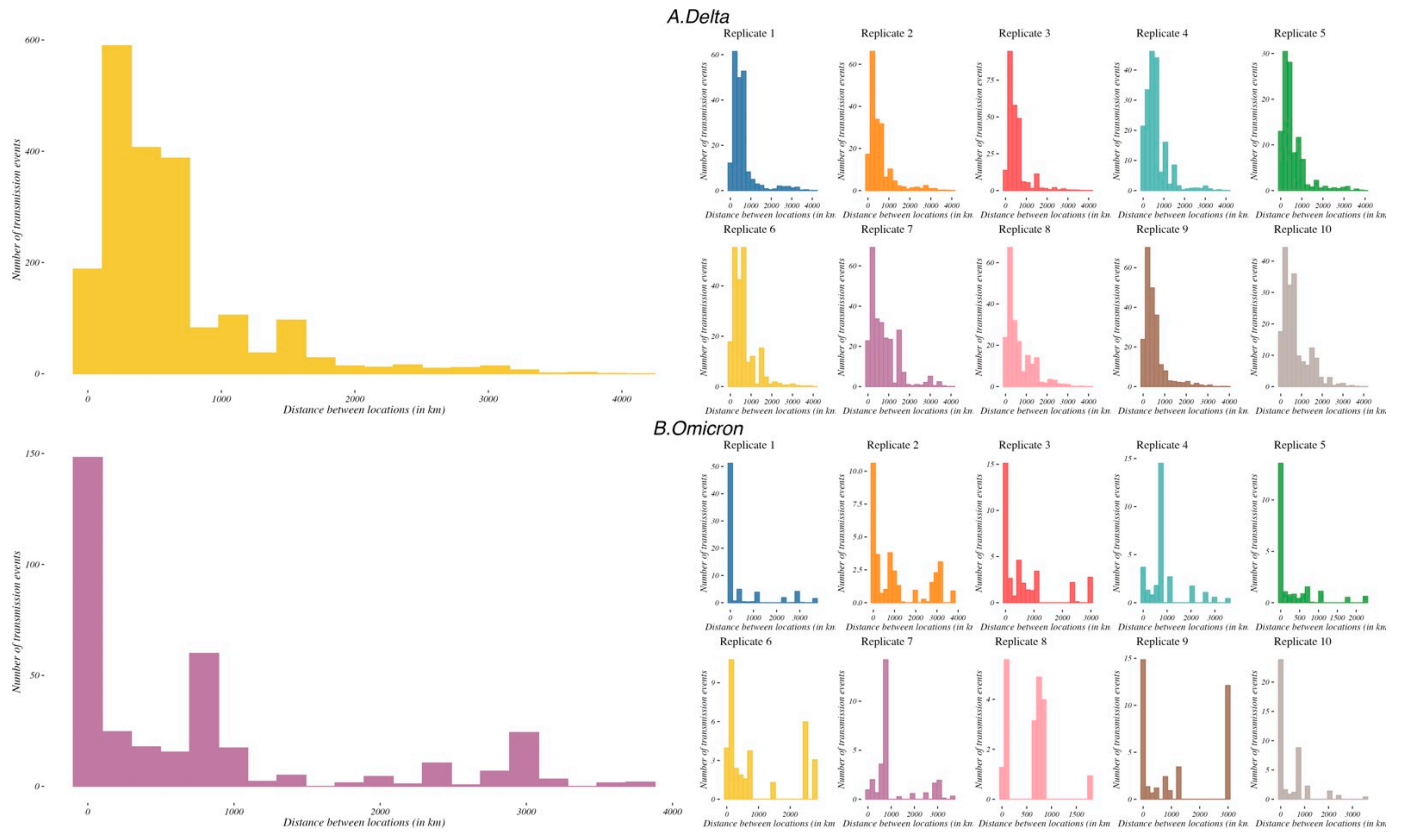

**Supplementary Figure S11. Density of viral migration events across the US Mexico border and international travels.**

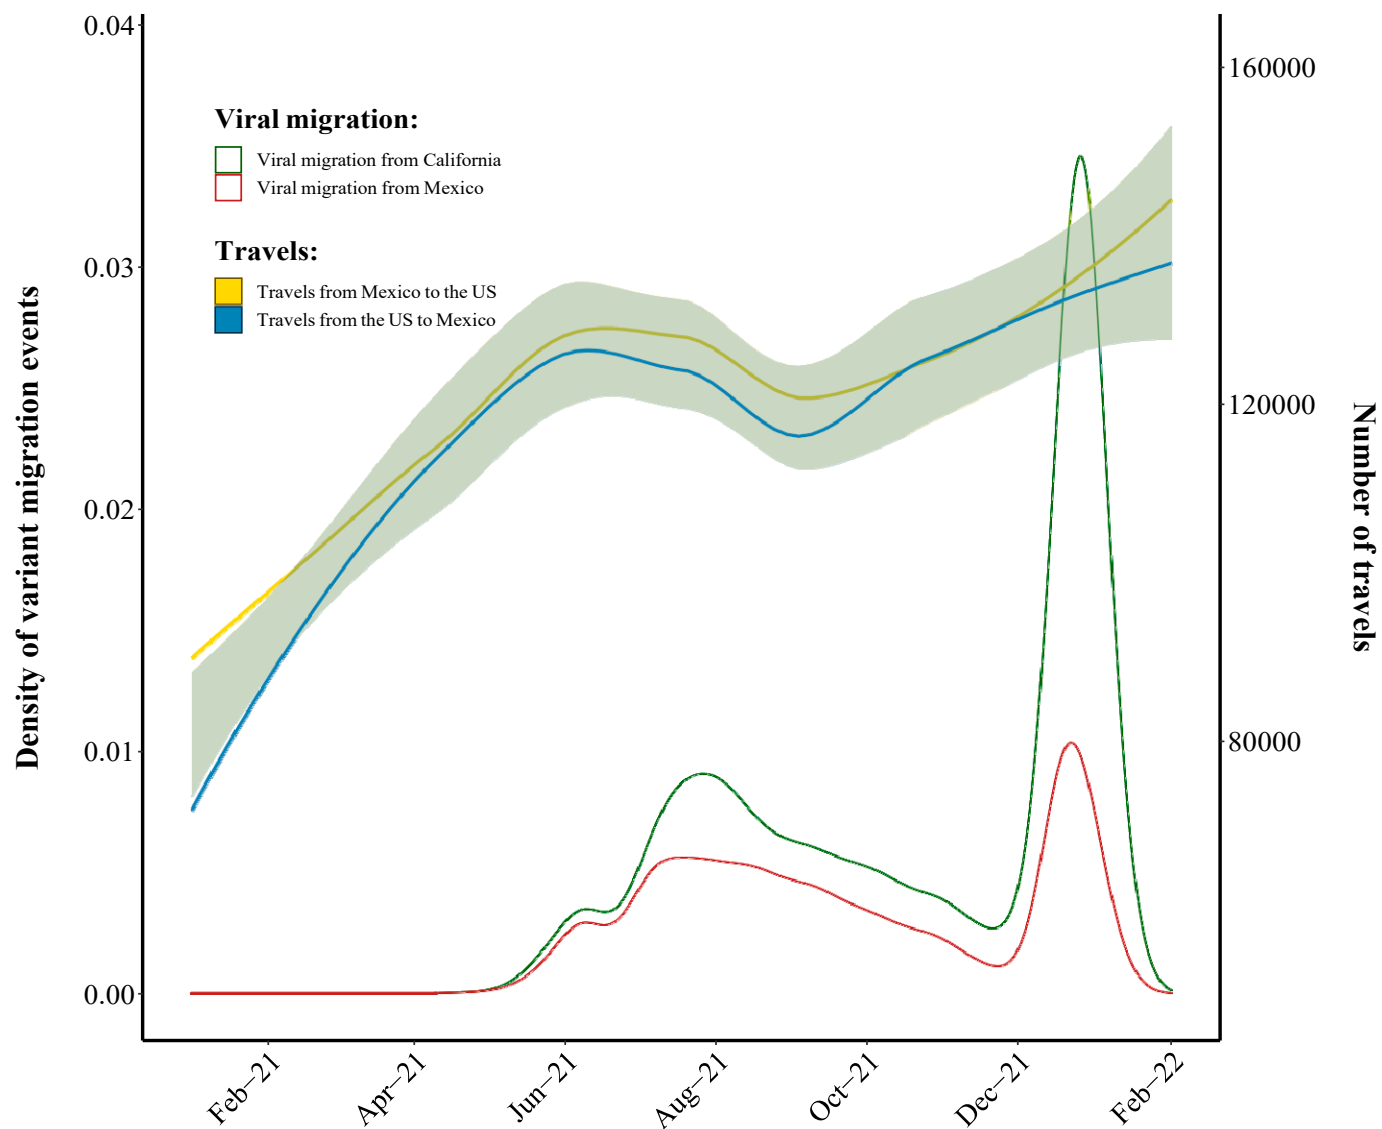

Supplement: s1 [file s1]
